# Supplementary material
Source: publisher site journal article supplement (https://www.dovepress.com/article/372603)
Supplement: Supplementary file 1 [file get_supplementary_file.php]

**Guideline for interviews with transplantation patients**

| **Organisation** | | Time in min (approx.) |
| --- | --- | --- |
| - Prepare telephone and recording device | | n. a. |
| **Introductionary Words** | | 5 |
| **Introduction** | - Thanking them for participating - Short introduction as follows:   *My name is … and my colleague is … . We are both working on a project of the Center for Health Economics Research in Hannover, short: CHERH, regarding the allocation of donor Organs. The CHERH is endorsed by the Federal Ministry for Education and Research, and incorporates physicians and health care economists of Hannover Medical School and Leibniz University Hannover, which conduct health economic research. The major goal is optimizing the structure of the German health care system.* |
| **Aim** | *The aim today is, to understand from you as a directly affected person, after what criteria you personally would allocate deceased donor organs to potential recipients.*  *Optional: In the process of organ transplantation, there are three relevant pillars:*   1. *Donation* 2. *Allocation* 3. *Transplantation*   *Today we want to solely focus on the aspects of allocation.*  *Therefore, we are conducting an interview, supported by a guideline.* |
| **Consent to audio recording** | *I'll give you a few organizational details now, then we'll conduct the interview.*  *We will record the conversation with a recording device. We guarantee that your data will be handled confidentially.*  *In order for us to record this conversation, we need a verbal declaration of consent from you. Please let us know whether you agree to this conversation being recorded, transcribed anonymously and stored securely at the MHH for at least 10 years.* |  |
| **Questions** | |  |
| **1. Ice Breaker Question** | ***Please introduce yourself shortly. Who are you, in which regional group are you active and what was your motivation to take on the role of the regional coordinator?*** | 5 |
| **2. Introductory Questions**   - Used to introduce the topic to the participant and get them in the right mindset | **Benefit vs. Urgency**   - ***What is your perception of the allocation of donor organs in clincal practice? What are your experiences?*** - ***Do they differ depending on the organ?*** | 10 |
| **3. Transitional Question**   - Specifying the topic - Basis for key question | ***How do you assess the criteria currently in use, namely, “urgency” and “benefit”?*** | 10 |
| **4. Key Question**   - The key questions for the research - Most amount of time spent here | ***If it was up to you, what (other) criteria would you use for the allocation of donor organs?*** | 10 |
| - *Justice* - *Healthcare related factors* - *Way of life* - *Social behavior so far* - *Social status / situation* |
|  | *Are all criteria of equal importance?*  *Should different organs be allocated by different criteria?*  *Has your attitude towards these questions changed since taking on a role in the patient organisation?*  *Could you share some situations, which have shaped your current attitude? (Experiences, Fates, etc.)* |  |
| - Optional: How would you measure those criteria? |
| **5. Final questions** | ***Is there anything you would like to share that we haven’t talked about?***  ***There will be further interviews. Any recommended changes?*** | 5 |
| **The end** | Thanking the participants and offering to share the results with them after the evaluation has completed. | n. a. |
